# Supplementary material for: Neonatal cell population data: reference intervals and relevance for detecting sepsis and necrotizing enterocolitis
Source: Research Square preprint supplement (doi:10.21203/rs.3.rs-5984143/v1), 2025-02-14
Supplement: Supplementary file 1 [file d608125da7086306f28acd43.docx]

**Supplementary Material**

**Supplementary Table S1.** Description of leukocyte Cell Population Data

| CPD parameter | Description | Unit |
| --- | --- | --- |
| NE-SSC | Neutrophil cell complexity | ch |
| NE-SFL | Neutrophil fluorescence intensity | ch |
| NE-FSC | Neutrophil cell size | ch |
| NE-WX | Distribution width of neutrophil cell complexity |  |
| NE-WY | Distribution width of neutrophil fluorescence intensity |  |
| NE-WZ | Distribution width of neutrophil cell size |  |
| MO-X | Monocyte cells complexity | ch |
| MO-Y | Monocyte fluorescence intensity | ch |
| MO-Z | Monocyte cell size | ch |
| MO-WX | Distribution width of monocyte cells complexity |  |
| MO-WY | Distribution width of monocyte fluorescence intensity |  |
| MO-WZ | Distribution width of monocyte cell size |  |
| LY-X | Lymphocyte cells complexity | ch |
| LY-Y | Lymphocyte fluorescence intensity | ch |
| LY-Z | Lymphocyte cell size | ch |
| LY-WX | Distribution width of lymphocyte cells complexity |  |
| LY-WY | Distribution width of lymphocyte fluorescence intensity |  |
| LY-WZ | Distribution width of lymphocyte cell size |  |

ch, arbitrary units of light scattering.

**Supplementary figure S1.** Study Flow chart.

Eligible patients (n=1681)

Excluded (n=602)

- Missing CPD parameters (n=512)
- Refusal of general consent of research (n=90)

Excluded (n=135)

- Received antibiotics for at least 5 days for presumed culture-negative sepsis or focal infection (n=70)
- Comorbidities potentially impacting CPD (n=65)

Sepsis or NEC (n=39)

Control group (n=905)

**Supplementary Table S2.** Interval between suspicion time and Cell Population Data analysis

| Patient number | CPD interval (hours) |
| --- | --- |
| 1 | 0 |
| 2 | -3 |
| 3 | 0 |
| 4 | 0 |
| 5 | -9 |
| 6 | 10 |
| 7 | 0 |
| 8 | -2 |
| 9 | 58 |
| 10 | 5 |
| 11 | 55 |
| 12 | 0 |
| 13 | 44 |
| 14 | 84 |
| 15 | -17 |
| 16 | 0 |
| 17 | 0 |
| 18 | 15 |
| 19 | 0 |
| 20 | 10 |
| 21 | 2 |
| 22 | 1 |
| 23 | 0 |
| 24 | -6 |
| 25 | 32 |
| 26 | 0 |
| 27 | -11 |
| 28 | -4 |
| 29 | -11 |
| 30 | 0 |
| 31 | -6 |
| 32 | 0 |
| 33 | 0 |
| 34 | -13 |
| 35 | 3 |
| 36 | -17 |
| 37 | 0 |
| 38 | 31 |
| 39 | 0 |

CPD, Cell Population Data. Time elapsed between the blood culture and/or abdominal X-ray and the blood sample collection for CPD parameters.

**Supplementary Table S3.** Demographic, clinical, and microbiological characteristics of patients, in a population including controls with comorbidities potentially impacting Cell Population Data.

|  | Control group  n = 970 | Sepsis/NEC group  n = 39 | P value |
| --- | --- | --- | --- |
| Postnatal age (days)  at sepsis or NEC onset | — | 9 (6-20) | — |
| Birth weight (kg) | 2.8 (1.9-3.4) | 0.9 (0.7-2.0) | <0.001 |
| Gestational age (weeks) | 37 (34-40) | 28 (26-34) | <0.001 |
| Female | 414 (44) | 23 (59) | 0.06 |
| Pathogens in blood culture proven sepsis | — | 34 (87) | — |
| *Escherichia coli* | — | 8 (24) | — |
| *Coagulase-negative staphylococci* | — | 6 (18) | — |
| *Staphylococcus aureus* | — | 4 (12) | — |
| *Streptococcus agalactiae* | — | 3 (9) | — |
| *Klebsiella pneumoniae* | — | 3 (9) | — |
| *Klebsiella oxytoca* | — | 2 (6) | — |
| *Candida albicans* | — | 2 (6) | — |
| Others pathogens | — | 6 (17) | — |
| Early-onset sepsis | — | 8 (24) | — |
| Late-onset sepsis | — | 26 (76) | — |
| Necrotizing enterocolitis | — | 10 (26) | — |

Continuous variables are reported as median (interquartile range). Categorical variables are reported as number (percent). Early-onset sepsis: onset before 72 hours of life; late-onset sepsis: onset after 72 hours of life.

Other pathogens include *Achromobacter ssp., Bifidobacterium breve, Clostridium neonatale, Enterobacter cloacae, Enterococcus faecalis, Lacticaseibacillus rhamnosus.*

**Supplementary Table 4.** Mixed effect model and Estimated Marginal Means for Cell Population Data on the day of birth.

| Parameter |  | < 28 weeks gestation | 28 to 36 weeks gestation | > 36 weeks gestation |
| --- | --- | --- | --- | --- |
| NE-SSC | Fixed effect: gestational age | Ref | +1.84 | +3.09** |
| EMMs (95% CI) | 147.6 (145.6–149.6) | 149.5 (148.9–150.0) | 150.7 (150.2–151.2) ** |
| NE-SFL | Fixed effect: gestational age | Ref | -5.01*** | -2.93* |
| EMMs (95% CI) | 45.5 (42.7–48.4) | 40.5 (39.7–41.3)** | 42.6 (41.9–43.4) |
| NE-FSC | Fixed effect: gestational age | Ref | +1.49 | 2.32** |
| EMMs (95% CI) | 84.9 (83.3–86.6) | 86.4 (86.0–87.0) | 87.3 (86.8–87.7)* |
| NE-WX | Fixed effect: gestational age | Ref | -36.05*** | -52.72*** |
| EMMs (95% CI) | 408.0 (394.0–423.0) | 372.0 (368.0–376.0) *** | 356.0 (352.0–360.0) *** |
| NE-WY | Fixed effect: gestational age | Ref | -234.74*** | -178.35*** |
| EMMs (95% CI) | 1106.0 (1027.0–1184.0) | 871.0 (849.0–893.0)*** | 927.0 (906.0–948.0)*** |
| NE-WZ | Fixed effect: gestational age | Ref | -31.55** | -38.24*** |
| EMMs (95% CI) | 775.0 (755.0–795.0) | 744.0 (738.0–750.0)** | 737.0 (732.0–743.0)*** |
| MO-X | Fixed effect: gestational age | Ref | -1.73* | -0.21 |
| EMMs (95% CI) | 115.8 (114.5–117.1) | 114.1 (113.7–114.5) * | 115.6 (115.3–116.0) |
| MO-Y | Fixed effect: gestational age | Ref | -0.83 | +2.50 |
| EMMs (95% CI) | 79.1 (76.0–82.2) | 78.3 (77.4–79.2) | 81.6 (80.8–82.5) |
| MO-Z | Fixed effect: gestational age | Ref | -0.93 | -0.91 |
| EMMs (95% CI) | 69.6 (68.4–70.8) | 68.7 (68.3–69.0) | 68.7 (68.4–69.0) |
| MO-WX | Fixed effect: gestational age | Ref | -32.95** | -36.37*** |
| EMMs (95% CI) | 321.0 (301.0–340.0) | 288.0 (282.0–293.0) ** | 284.0 (279.0–289.0) ** |
| Parameter |  | < 28 weeks gestation | 28 to 36 weeks gestation | > 36 weeks gestation |
| MO-WY | Fixed effect: gestational age | Ref | -189.65*** | -240.21*** |
| EMMs (95% CI) | 1063.0 (1006.0–1120.0) | 873.0 (857.0–890.0) *** | 823.0 (807.0–838.0) *** |
| MO-WZ | Fixed effect: gestational age | Ref | -31.52 | -53.61** |
| EMMs (95% CI) | 735.0 (702.0–769.0) | 704.0 (694.0–714.0) | 682.0 (673.0–691.0) ** |
| LY.X | Fixed effect: gestational age | Ref | -1.08 | -2.15** |
| EMMs (95% CI) | 79.29 (77.88–80.70) | 78.21 (77.80–78.63) | 77.14 (76.76–77.52)* |
| LY-Y | Fixed effect: gestational age | Ref | +9.26*** | +11.14*** |
| EMMs (95% CI) | 43.0 (39.0–47.0) | 52.3 (51.1–53.5)*** | 54.2 (53.1–55.2)*** |
| LY-Z | Fixed effect: gestational age | Ref | +1.05 | +1.24 |
| EMMs (95% CI) | 55.6 (53.3–57.8) | 56.6 (56.0–57.3) | 56.8 (56.2–57.4) |
| LY-WX | Fixed effect: gestational age | Ref | -16.38 | +4.09 |
| EMMs (95% CI) | 505.0 (477.0–533.0) | 488.0 (480.0–497.0) | 509.0 (501.0–517.0) |
| LY-WY | Fixed effect: gestational age | Ref | -552.87*** | -654.42*** |
| EMMs (95% CI) | 1755.0 (1606.0–1904.0) | 1202.0 (1158.0–1246.0)*** | 1100.0 (1060.0–1141.0)*** |
| LY-WZ | Fixed effect: gestational age | Ref | -61.83 | -92.51** |
| EMMs (95% CI) | 876.0 (815.0–937.0) | 814.0 (797.0–832.0) | 784.0 (768.0–800)* |

CPD are reported in arbitrary units of light scattering (ch); Reference group: < 28 weeks gestation.

*: P-value < 0.05; **: P-value < 0.01, ***: P-value < 0.001; P-values are relative to the reference group.

EMMs: Estimated Marginal Means.

**Supplementary Table 5.** Mixed effect model and Estimated Marginal Means for Cell Population Data during the first 28 days of life.

| Parameter |  | < 28 weeks gestation | 28 to 36 weeks gestation | > 36 weeks gestation |
| --- | --- | --- | --- | --- |
| NE-SSC | Fixed effect: gestational age | Ref. | +4.10*** | +5.54*** |
| Fixed effect: postnatal age | +0.03* | -0.02 | -0.04* |
| EMMs (95% CI) | 145.5 (144.0–147.0) | 149.5 (149.1–149.9)*** | 150.8 (150.4–151.1)*** |
| NE-SFL | Fixed effect: gestational age | Ref. | -3.16** | -2.13* |
| Fixed effect: postnatal age | -0.05** | +0.08*** | +0.13*** |
| EMMs (95% CI) | 43.7 (42.1–45.3) | 41.2 (40.7–41.6)** | 42.6 (42.1–43.0) |
| NE-FSC | Fixed effect: gestational age | Ref. | +3.89*** | +4.43*** |
| Fixed effect: postnatal age | +0.05*** | -0.02 | -0.03* |
| EMMs (95% CI) | 83.2 (82.0–84.4) | 86.9 (86.6–87.3)*** | 87.3 (87.0–87.6)*** |
| NE-WX | Fixed effect: gestational age | Ref. | -43.75*** | -56.49*** |
| Fixed effect: postnatal age | -0.80*** | +0.38** | +0.76*** |
| EMMs (95% CI) | 405.0 (396.0–413.0) | 364.0 (361.0–367.0)*** | 354.0 (352.0–357.0)*** |
| NE-WY | Fixed effect: gestational age | Ref. | -167.13*** | -167.64*** |
| Fixed effect: postnatal age | -5.44*** | +2.28** | +2.28** |
| EMMs (95% CI) | 960.0 (915.0–1004.0) | 810.0 (796.0–824.0)*** | 810.0 (797.0–822.0)*** |
| NE-WZ | Fixed effect: gestational age | Ref. | -14.40* | -13.92* |
| Fixed effect: postnatal age | -0.59** | -0.19 | +0.71* |
| EMMs (95% CI) | 755.4 (744.1–766.6) | 739.5 (735.5–743.4)* | 746.9 (743.3–750.5) |

| Parameter |  | < 28 weeks gestation | 28 to 36 weeks gestation | > 36 weeks gestation |
| --- | --- | --- | --- | --- |
| MO-X | Fixed effect: gestational age | Ref | -0.17 | +1.44** |
| Fixed effect: postnatal age | 0.00 | +0.03* | +0.04** |
| EMMs (95% CI) | 115.3 (114.4–116.2) | 115.4 (115.1–115.7) | 117.1 (116.9–117.3) *** |
| MO-Y | Fixed effect: gestational age | Ref. | +0.08 | +3.54 ** |
| Fixed effect: postnatal age | +0.15 *** | +0.23 *** | +0.27 *** |
| EMMs (95% CI) | 83.3 (81.0–85.7) | 83.3 (82.5–84.0) | 87.8 (87.2–88.4) ** |
| MO-Z | Fixed effect: gestational age | Ref. | +0.34 | +0.31 |
| Fixed effect: postnatal age | -0.04 ** | -0.03 | -0.02 |
| EMMs (95% CI) | 68.7 (67.8–69.5) | 69.1 (68.9–69.4) | 68.9 (68.7–69.1) |
| MO-WX | Fixed effect: gestational age | Ref | -28.28*** | -30.95*** |
| Fixed effect: postnatal age | -0.97*** | +0.52** | +0.84*** |
| EMMs (95% CI) | 308.0 (299.0–316.0) | 283.0 (280.0–286.0) *** | 283.0 (280.0–286.0) *** |
| MO-WY | Fixed effect: gestational age | Ref. | -174.13 *** | -240.80 *** |
| Fixed effect: postnatal age | -4.18 *** | +2.08 *** | +3.02 *** |
| EMMs (95% CI) | 1006.0 (976.0–1035.0) | 848.0 (838.0–857.0) *** | 788.0 (780.0–797.0) *** |
| MO-WZ | Fixed effect: gestational age | Ref. | -19.9* | -21.9 |
| Fixed effect: postnatal age | -0.6* | +0.2 | +0.9** |
| EMMs (95% CI) | 700.0 (686.0–714.0) | 681.0 (677.0–686.0)* | 685.0 (681.0–690.0) |

| Parameter |  | < 28 weeks gestation | 28 to 36 weeks gestation | > 36 weeks gestation |
| --- | --- | --- | --- | --- |
| LY-X | Fixed effect: gestational age | Ref. | -1.28* | -3.06*** |
| Fixed effect: postnatal age | +0.01 | 0.00 | 0.00 |
| EMMs (95% CI) | 80.5 (79.5–81.5) | 79.2 (78.8–79.5)* | 77.4 (77.1–77.7)*** |
| LY-Y | Fixed effect: gestational age | Ref. | +1.06 | +1.43 |
| Fixed effect: postnatal age | +0.34*** | -0.15*** | -0.13* |
| EMMs (95% CI) | 58.0 (55.5–60.6) | 58.0 (57.1–58.9) | 58.5 (57.8–59.3) |
| LY-Z | Fixed effect: gestational age | Ref. | +1.25 | +0.83 |
| Fixed effect: postnatal age | -0.08 | -0.05** | -0.03 |
| EMMs (95% CI) | 57.6 (56.4–58.7) | 58.5 (58.1–58.9) | 58.1 (57.8–58.5) |
| LY-WX | Fixed effect: gestational age | Ref. | -22.7 | +11.2 |
| Fixed effect: postnatal age | -0.8** | +0.9** | +1.6*** |
| EMMs (95% CI) | 510 (491–528) | 487 (481–493) | 521 (516–526) |
| LY-WY | Fixed effect: gestational age | Ref. | -388.17*** | -475.12*** |
| Fixed effect: postnatal age | -13.36*** | -3.29*** | -2.39*** |
| EMMs (95% CI) | 1407.0 (1323.0–1491.0) | 1095.0 (1065.0–1126.0)*** | 1015.0 (990.0–1041.0)*** |
| LY-WZ | Fixed effect: gestational age | Ref. | -86.09*** | -115.12*** |
| Fixed effect: postnatal age | -3.74*** | +1.72*** | +1.40* |
| EMMs (95% CI) | 816.0 (783.0–849.0)*** | 743.0 (732.0–754.0)*** | 711.0 (702.0–720.0)*** |

CPD are reported in arbitrary units of light scattering (ch); Reference group: < 28 weeks gestation.

*: P-value < 0.05; **: P-value < 0.01, ***: P-value < 0.001; P-values are relative to the reference group.

EMMs: Estimated Marginal Means.

**Supplementary Table 6.** Cell Population Data in patients with sepsis/necrotizing enterocolitis and controls, in a population including controls with comorbidities potentially impacting Cell Population Data.

| Parameter | Control group | Sepsis/NEC group | P value |
| --- | --- | --- | --- |
| NE-SSC | 149.8 (146.9-152.8) | 148.7 (144.4-152.6) | 0.10 |
| NE-SFL | 41.3 (39.0-44.1) | 56.2 (46.5-63.7) | <0.001 |
| NE-FSC | 86.7 (84.2-89.1) | 84.3 (80.9-86.2) | <0.001 |
| NE-WX | 355.0 (338.0-381.0) | 358.0 (334.0-400.2) | 0.67 |
| NE-WY | 792.0 (699.0-906.0) | 904.5 (788.2-1123.5) | <0.001 |
| NE-WZ | 739.0 (709.0-771.0) | 747.5 (718.2-794.0) | 0.09 |
| MO-X | 116.2 (114.4-118.4) | 118.7 (115.6-123.2) | <0.001 |
| MO-Y | 85.9 (80.3-92) | 94.4 (85.7-103.8) | <0.001 |
| MO-Z | 69.2 (67.2-71.2) | 69.8 (67.3-73.0) | 0.35 |
| MO-WX | 279.0 (261.0-301.0) | 302.5 (273.0-367.2) | <0.001 |
| MO-WY | 820.0 (741.0-909.0) | 869.0 (710.0-997.2) | 0.54 |
| MO-WZ | 678.0 (638.0-717.0) | 683.5 (621.2-731.0) | 0.95 |
| LY-X | 78.4 (76.6-80.5) | 81.3 (80.6-82.2) | <0.001 |
| LY-Y | 58.8 (54.0-63.5) | 65.4 (58.2-70.6) | 0.06 |
| LY-Z | 58.6 (56.8-60.1) | 59.7 (58.2-62) | <0.05 |
| LY-WX | 502.0 (471.0-539.8) | 492.0 (458.0-523.0) | 0.22 |
| LY-WY | 1009.0 (937.0-1160.0) | 1225.0 (1078.0-1342.0) | <0.001 |
| LY-WZ | 705.0 (665.0-809.0) | 790.0 (690.0-864.0) | <0.05 |

Data are expressed as median (interquartile range). Cell Population Data are reported in arbitrary units of light scattering (ch).

LY-X, LY-Y, LY-Z, LY-WX, LY-WY, and LY-WZ were analyzed in 433 out of 905 patients (48%), as data was not stored for 472 patients.

**Supplementary Table 7**. Diagnostic accuracy of Cell Population Data compared to classical hematological parameters and C-reactive protein, in a population including controls with comorbidities potentially impacting Cell Population Data.

| Parameter | AUROC | Cut off value | Sp% | Se% | PPV % | NPV% | AP |
| --- | --- | --- | --- | --- | --- | --- | --- |
| NE-SSC | 0.57 | 147.2 | 72 | 46 | 6 | 97 | 0.01 |
| NE-SFL | 0.88 | 49.8 | 92 | 73 | 28 | 99 | 0.20 |
| NE-FSC | 0.70 | 85.7 | 62 | 73 | 7 | 98 | 0.01 |
| NE-WX | 0.52 | 422.5 | 92 | 21 | 10 | 97 | 0.03 |
| NE-WY | 0.67 | 888.5 | 72 | 58 | 8 | 98 | 0.05 |
| NE-WZ | 0.57 | 773.5 | 77 | 44 | 7 | 97 | 0.02 |
| MO-X | 0.67 | 117.2 | 64 | 71 | 7 | 98 | 0.16 |
| MO-Y | 0.70 | 93.6 | 80 | 56 | 10 | 98 | 0.09 |
| MO-Z | 0.54 | 72.8 | 89 | 27 | 10 | 97 | 0.06 |
| MO-WX | 0.68 | 322.5 | 87 | 46 | 12 | 97 | 0.05 |
| MO-WY | 0.53 | 962.5 | 85 | 35 | 9 | 97 | 0.03 |
| MO-WZ | 0.50 | 698.5 | 64 | 48 | 5 | 97 | 0.02 |
| LY-X | 0.68 | 79.8 | 85 | 42 | 10 | 97 | 0.06 |
| LY-Y | 0.65 | 64.8 | 80 | 57 | 10 | 98 | 0.04 |
| LY-Z | 0.63 | 61.7 | 92 | 38 | 16 | 97 | 0.04 |
| LY-WX | 0.58 | 525.5 | 33 | 86 | 5 | 98 | 0.01 |
| LY-WY | 0.73 | 1,181.5 | 78 | 62 | 10 | 98 | 0.05 |
| LY-WZ | 0.64 | 753.5 | 64 | 62 | 7 | 98 | 0.04 |
| Leukocytes (G/L) | 0.60 | 6.3 | 92 | 46 | 18 | 98 | 0.04 |
| Neutrophils (G/L) | 0.62 | 3.6 | 72 | 51 | 7 | 97 | 0.06 |
| Bands (G/L) | 0.66 | 0.2 | 44 | 87 | 6 | 99 | 0.05 |
| Leucopenia (G/L) | 0.60 | <5 | 97 | 33 | 29 | 97 | 0.04 |
| Neutropenia (G/L) | 0.62 | <1.5 | 94 | 22 | 14 | 97 | 0.06 |
| I/T ratio (%) | 0.76 | 20 | 96 | 20 | 16 | 97 | 0.08 |
| CRP (mg/L) | 0.71 | 8.9 | 87 | 65 | 0.17 | 98 | 0.03 |
| NE-SFL + LY-X + CRP | 0.89 | 0.03 | 94 | 73 | 33 | 99 | 0.24 |
| NE-SFL + LY-X + Leucopenia | 0.89 | 0.02 | 90 | 77 | 25 | 99 | 0.22 |
| NE-SFL + LY-X + CRP + Leucopenia | 0.89 | 0.03 | 93 | 75 | 32 | 99 | 0.23 |

Cell Population Data are reported in arbitrary units of light scattering, ch; AUROC, area under the Receiver Operating Characteristic curve; Se, sensitivity, Sp, specificity; PPV, positive predictive value; NPV, negative predictive value; AP, Average Precision; CRP, C-reactive protein; I/T ratio, immature-to-total ratio.

**Supplementary Figure 2.** Receiver Operating Characteristic curve and Precision-Recall Curve of NE-SFL, LY-X, classical hematological parameters and C-reactive protein, in a population including controls with comorbidities potentially impacting Cell Population Data.


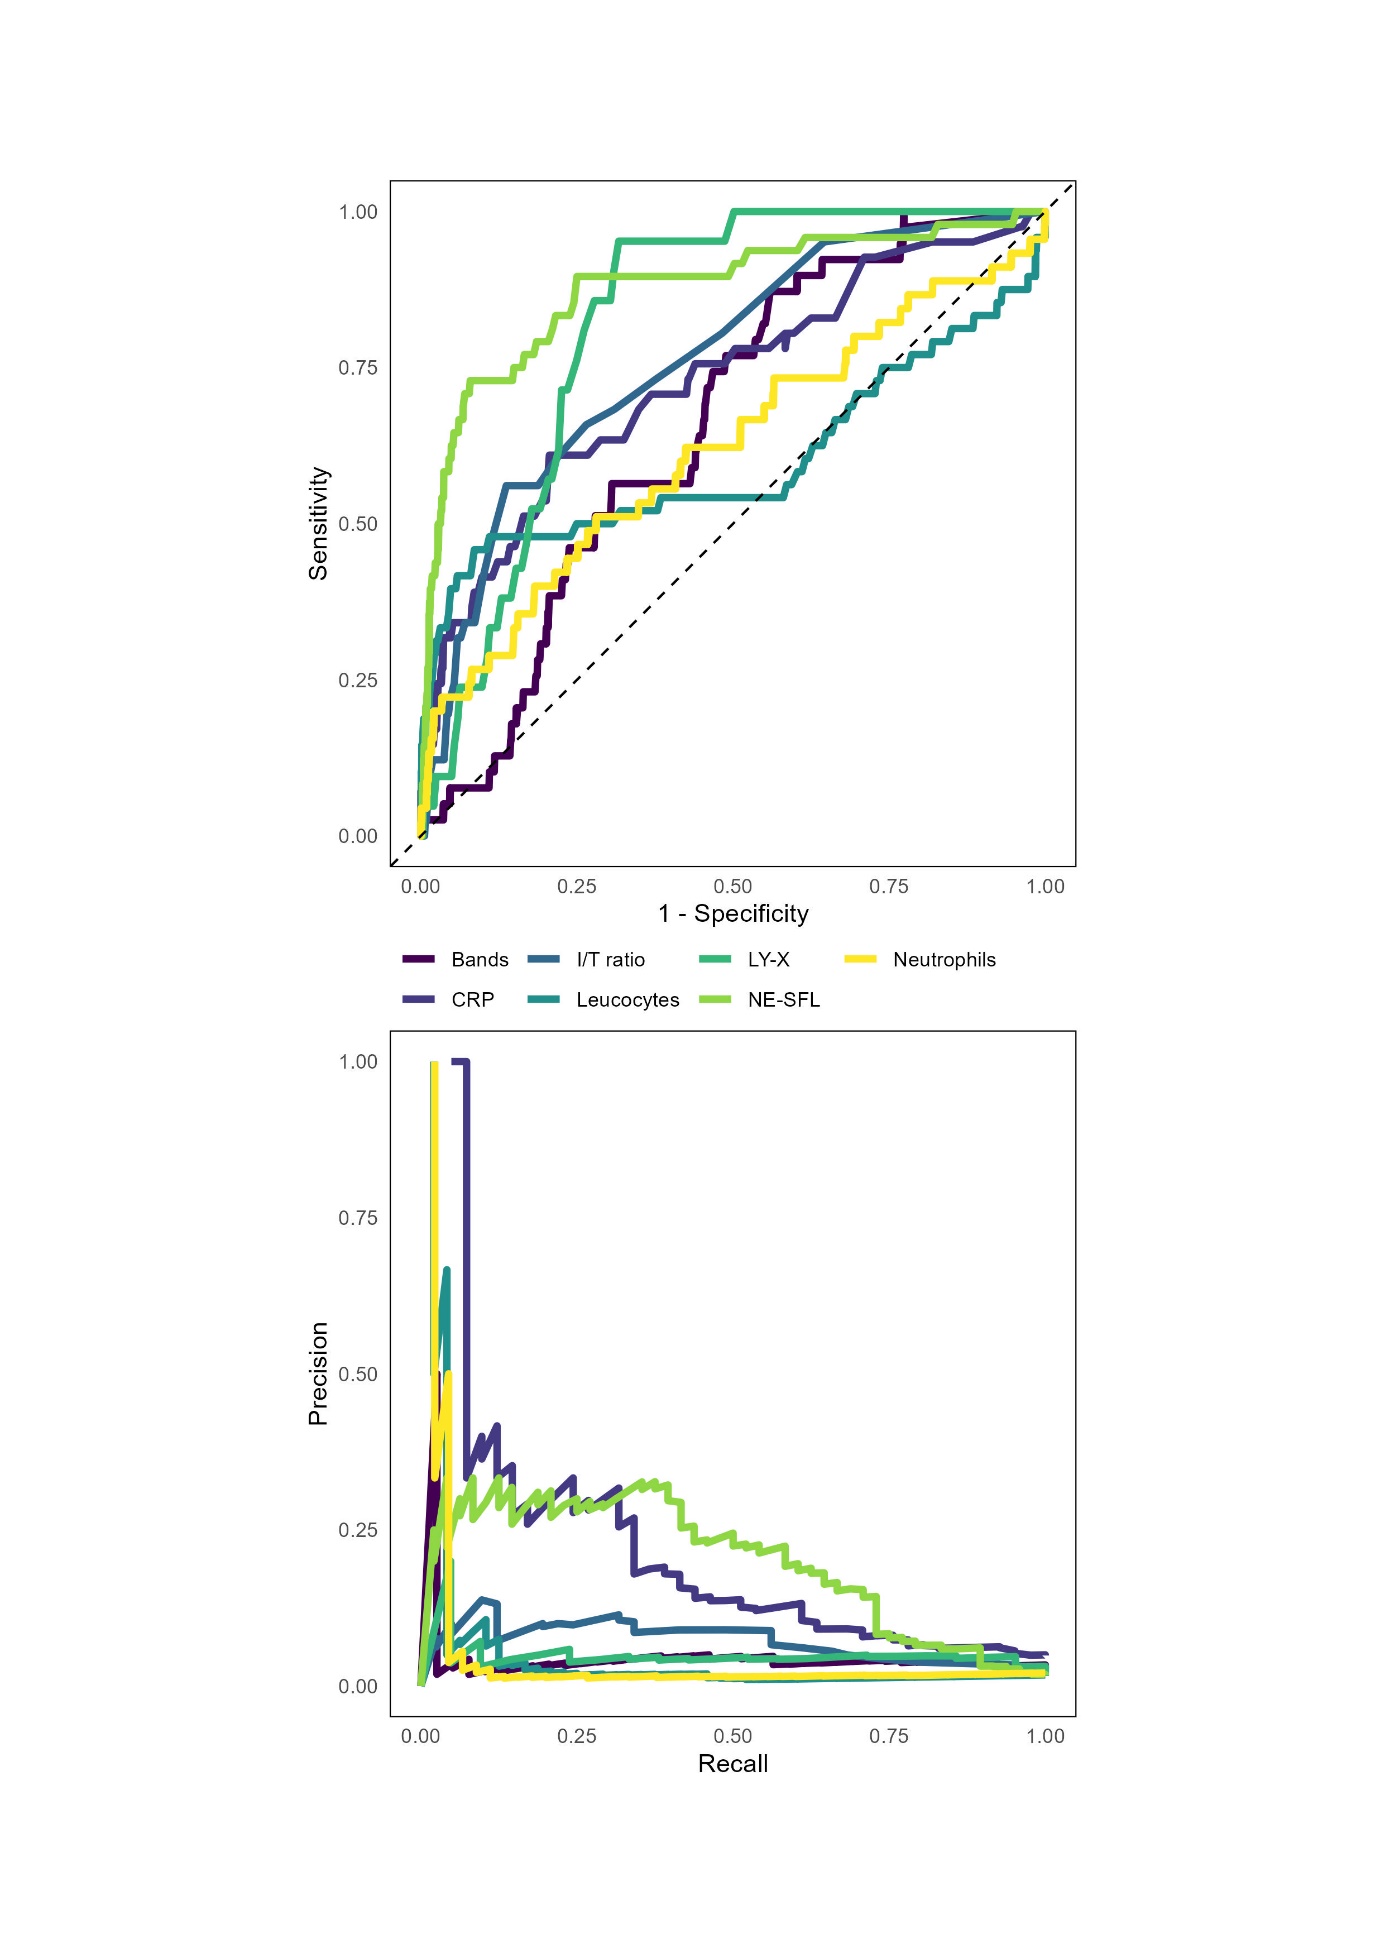


**a**

**b**

a) Receiver Operating Characteristic curve; b) Precision-Recall Curve

CRP, C-reactive protein; I/T ratio, immature-to-total ratio.

**Supplementary Table 8.** Regression coefficient results and Variance Inflation Factor for combined models, in the study population.

| Model | Variable | Estimate | Std. Error | P value | VIF |
| --- | --- | --- | --- | --- | --- |
| NE-SFL + LY-X + CRP | Intercept | -25.85 | 5.04 | <0.001 |  |
| NE-SFL | 0.14 | 0.02 | <0.001 | 1.32 |
| LY-X | 0.19 | 0.06 | <0.01 | 1.00 |
| CRP | 0.01 | 0.004 | <0.05 | 1.33 |
| NE-SFL + LY-X + Leucopenia | Intercept | -24.84 | 4.78 | <0.001 |  |
| NE-SFL | 0.14 | 0.02 | <0.001 | 1.09 |
| LY-X | 0.18 | 0.06 | <0.01 | 1.00 |
| Leucopenia | 1.46 | 0.41 | <0.001 | 1.09 |
| NE-SFL + LY-X + CRP + Leucopenia | Intercept | -23.41 | 4.23 | <0.001 |  |
| NE-SFL | 0.13 | 0.02 | <0.001 | 1.38 |
| LY-X | 0.18 | 0.06 | <0.01 | 1.01 |
| CRP | 0.01 | 0.005 | 0.11 | 1.41 |
| Leucopenia | 1.05 | 0.43 | <0.01 | 1.16 |

VIF, Variance Inflation Factor; CRP, C-reactive protein.

**Supplementary Table 9.** Cross-validation results for combined models in the study population.

| Model cross validation | Mean AUROC | Mean Se% | Mean Sp% |
| --- | --- | --- | --- |
| NE-SFL + LY-X + CRP | 0.90 | 17 | 99 |
| NE-SFL + LY-X + Leucopenia | 0.90 | 13 | 99 |
| NE-SFL + LY-X + CRP + Leucopenia | 0.90 | 15 | 99 |

AUROC, area under the Receiver Operating Characteristic curve; Se, sensitivity, Sp, specificity; CRP, C-reactive protein.

**Supplementary Figure 3.** Receiver Operating Characteristic curve and Precision-Recall Curve of three logistic regression model combining NE-SFL, LY-X, C-reactive protein, and leukopenia in the study population.


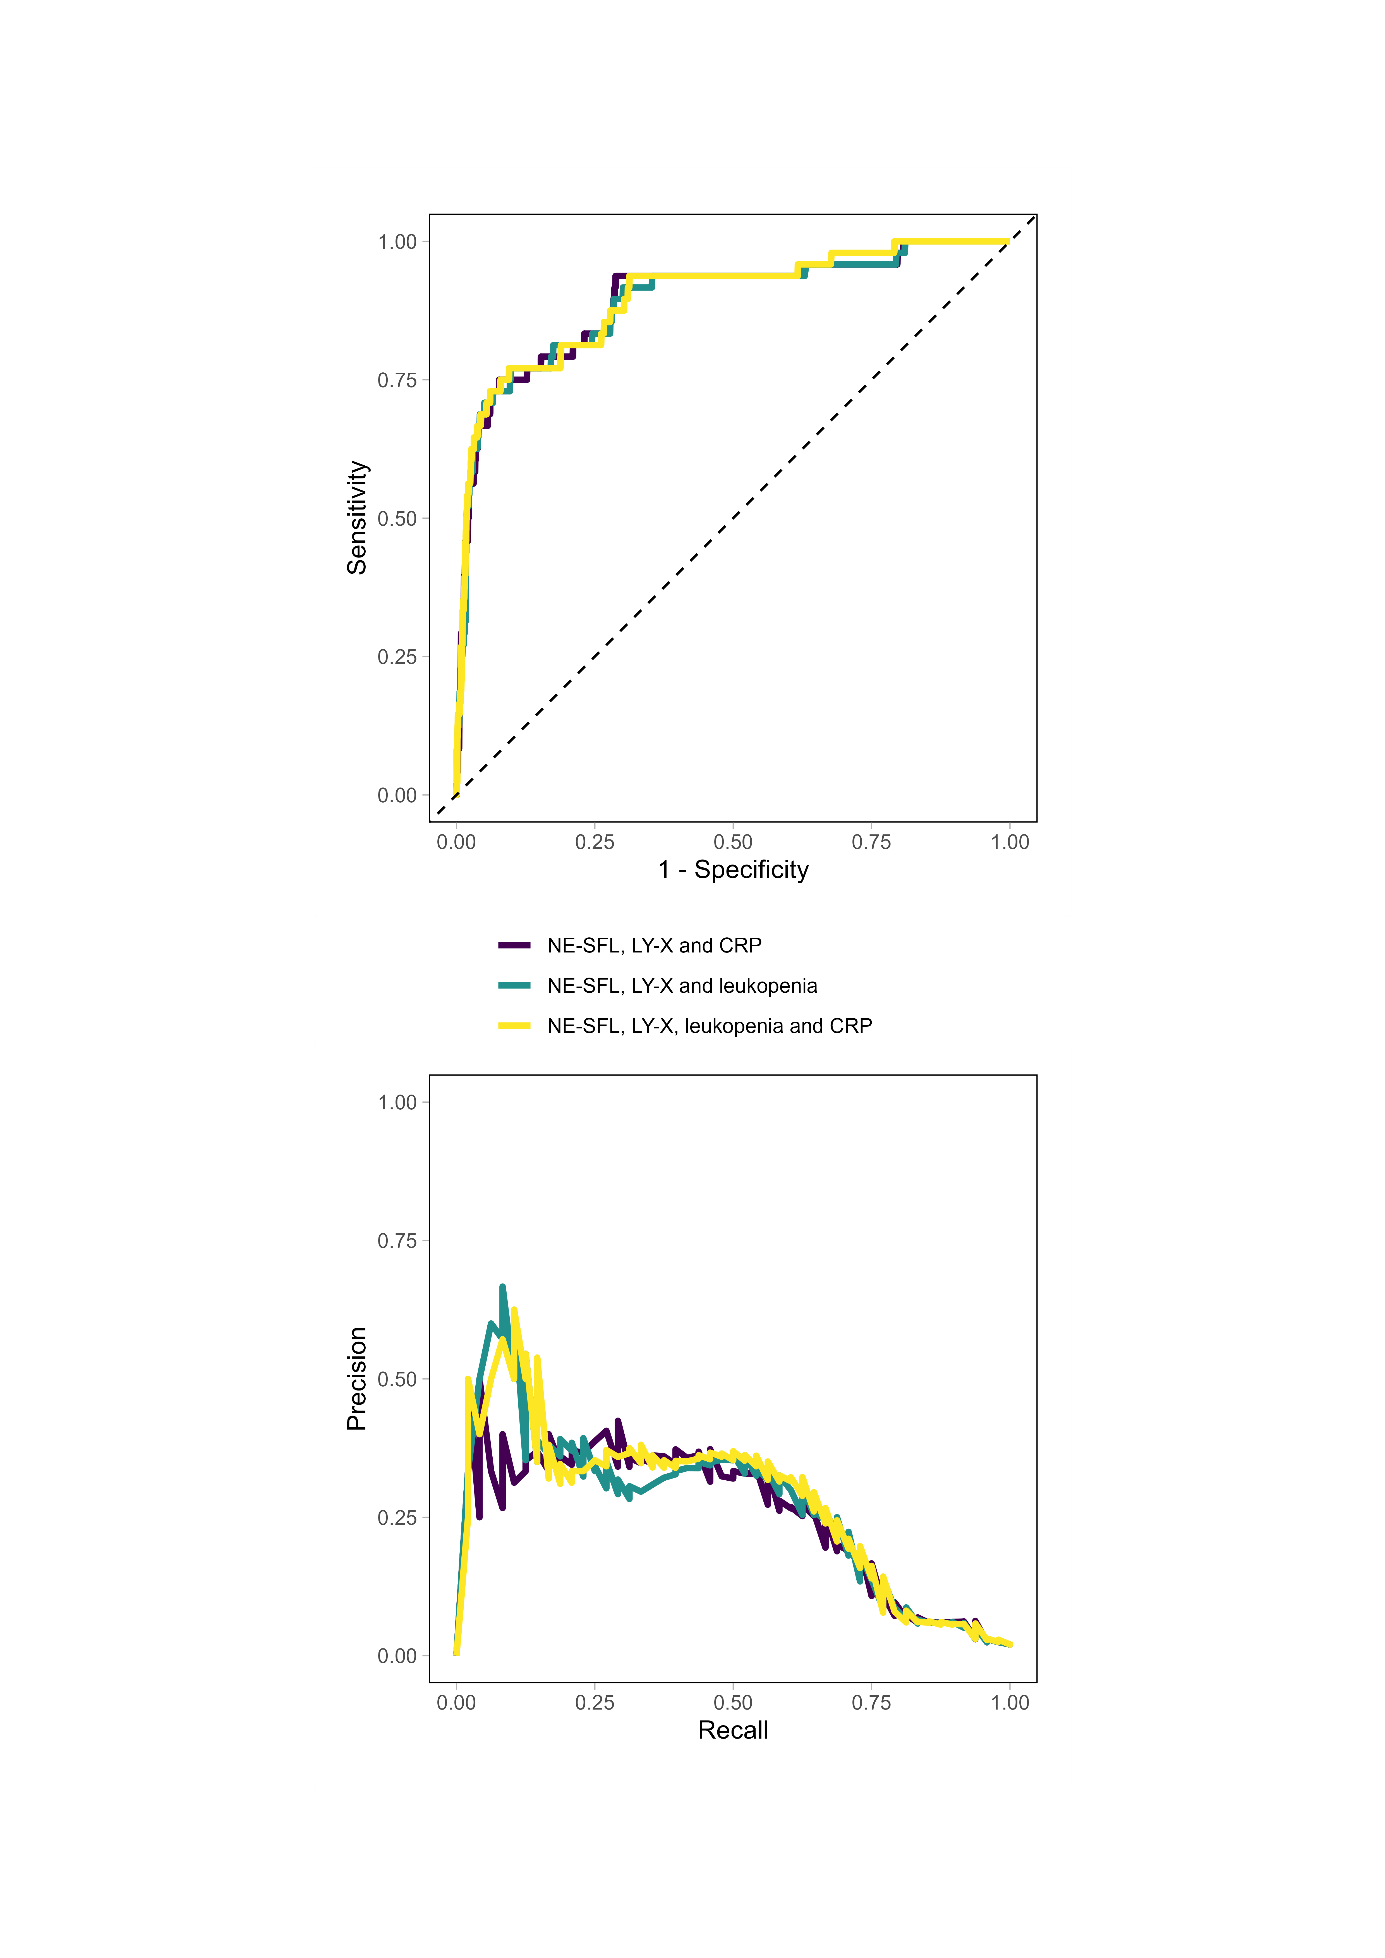


**a**

**b**

a) Receiver Operating Characteristic curve; b) Precision-Recall Curve

CRP, C-reactive protein; I/T ratio, immature-to-total ratio.

**Supplementary Table 10.** Regression coefficient results and Variance Inflation Factor for combined models, in a population including controls with comorbidities potentially impacting Cell Population Data.

| Model | Variable | Estimate | Std. Error | P value | VIF |
| --- | --- | --- | --- | --- | --- |
| NE-SFL + LY-X + CRP | Intercept | -23.81 | 4.23 | <0.001 |  |
| NE-SFL | 0.13 | 0.02 | <0.001 | 1.27 |
| LY-X | 0.17 | 0.05 | <0.01 | 1.01 |
| CRP | 0.01 | 0.00 | <0.01 | 1.28 |
| NE-SFL + LY-X + Leucopenia | Intercept | -23.53 | 4.15 | <0.001 |  |
| NE-SFL | 0.14 | 0.02 | <0.001 | 1.15 |
| LY-X | 0.16 | 0.05 | <0.01 | 1.00 |
| Leucopenia | 1.23 | 0.41 | <0.01 | 1.16 |
| NE-SFL + LY-X + CRP + Leucopenia | Intercept | -23.41 | 4.23 | <0.001 |  |
| NE-SFL | 0.12 | 0.02 | <0.001 | 1.39 |
| LY-X | 0.17 | 0.05 | <0.01 | 1.01 |
| CRP | 0.01 | 0.00 | <0.01 | 1.31 |
| Leucopenia | 1.05 | 0.43 | <0.05 | 1.19 |

VIF, Variance Inflation Factor; CRP, C-reactive protein

**Supplementary Table 11.** Cross-validation results for combined models, in a population including controls with comorbidities potentially impacting Cell Population Data.

| Model cross validation | Mean AUC | Mean Se% | Mean Sp% |
| --- | --- | --- | --- |
| NE-SFL + LY-X + CRP | 0.89 | 100 | 11 |
| NE-SFL + LY-X + Leucopenia | 0.90 | 100 | 13 |
| NE-SFL + LY-X + CRP + Leucopenia | 0.89 | 100 | 15 |

AUROC, area under the Receiver Operating Characteristic curve; Se, sensitivity, Sp, specificity; CRP, C-reactive protein.

**Supplementary Figure 4.** Receiver Operating Characteristic curve and Precision-Recall Curve of three logistic regression model combining NE-SFL, LY-X, C-reactive protein, and leukopenia, in a population including controls with comorbidities potentially impacting Cell Population Data.


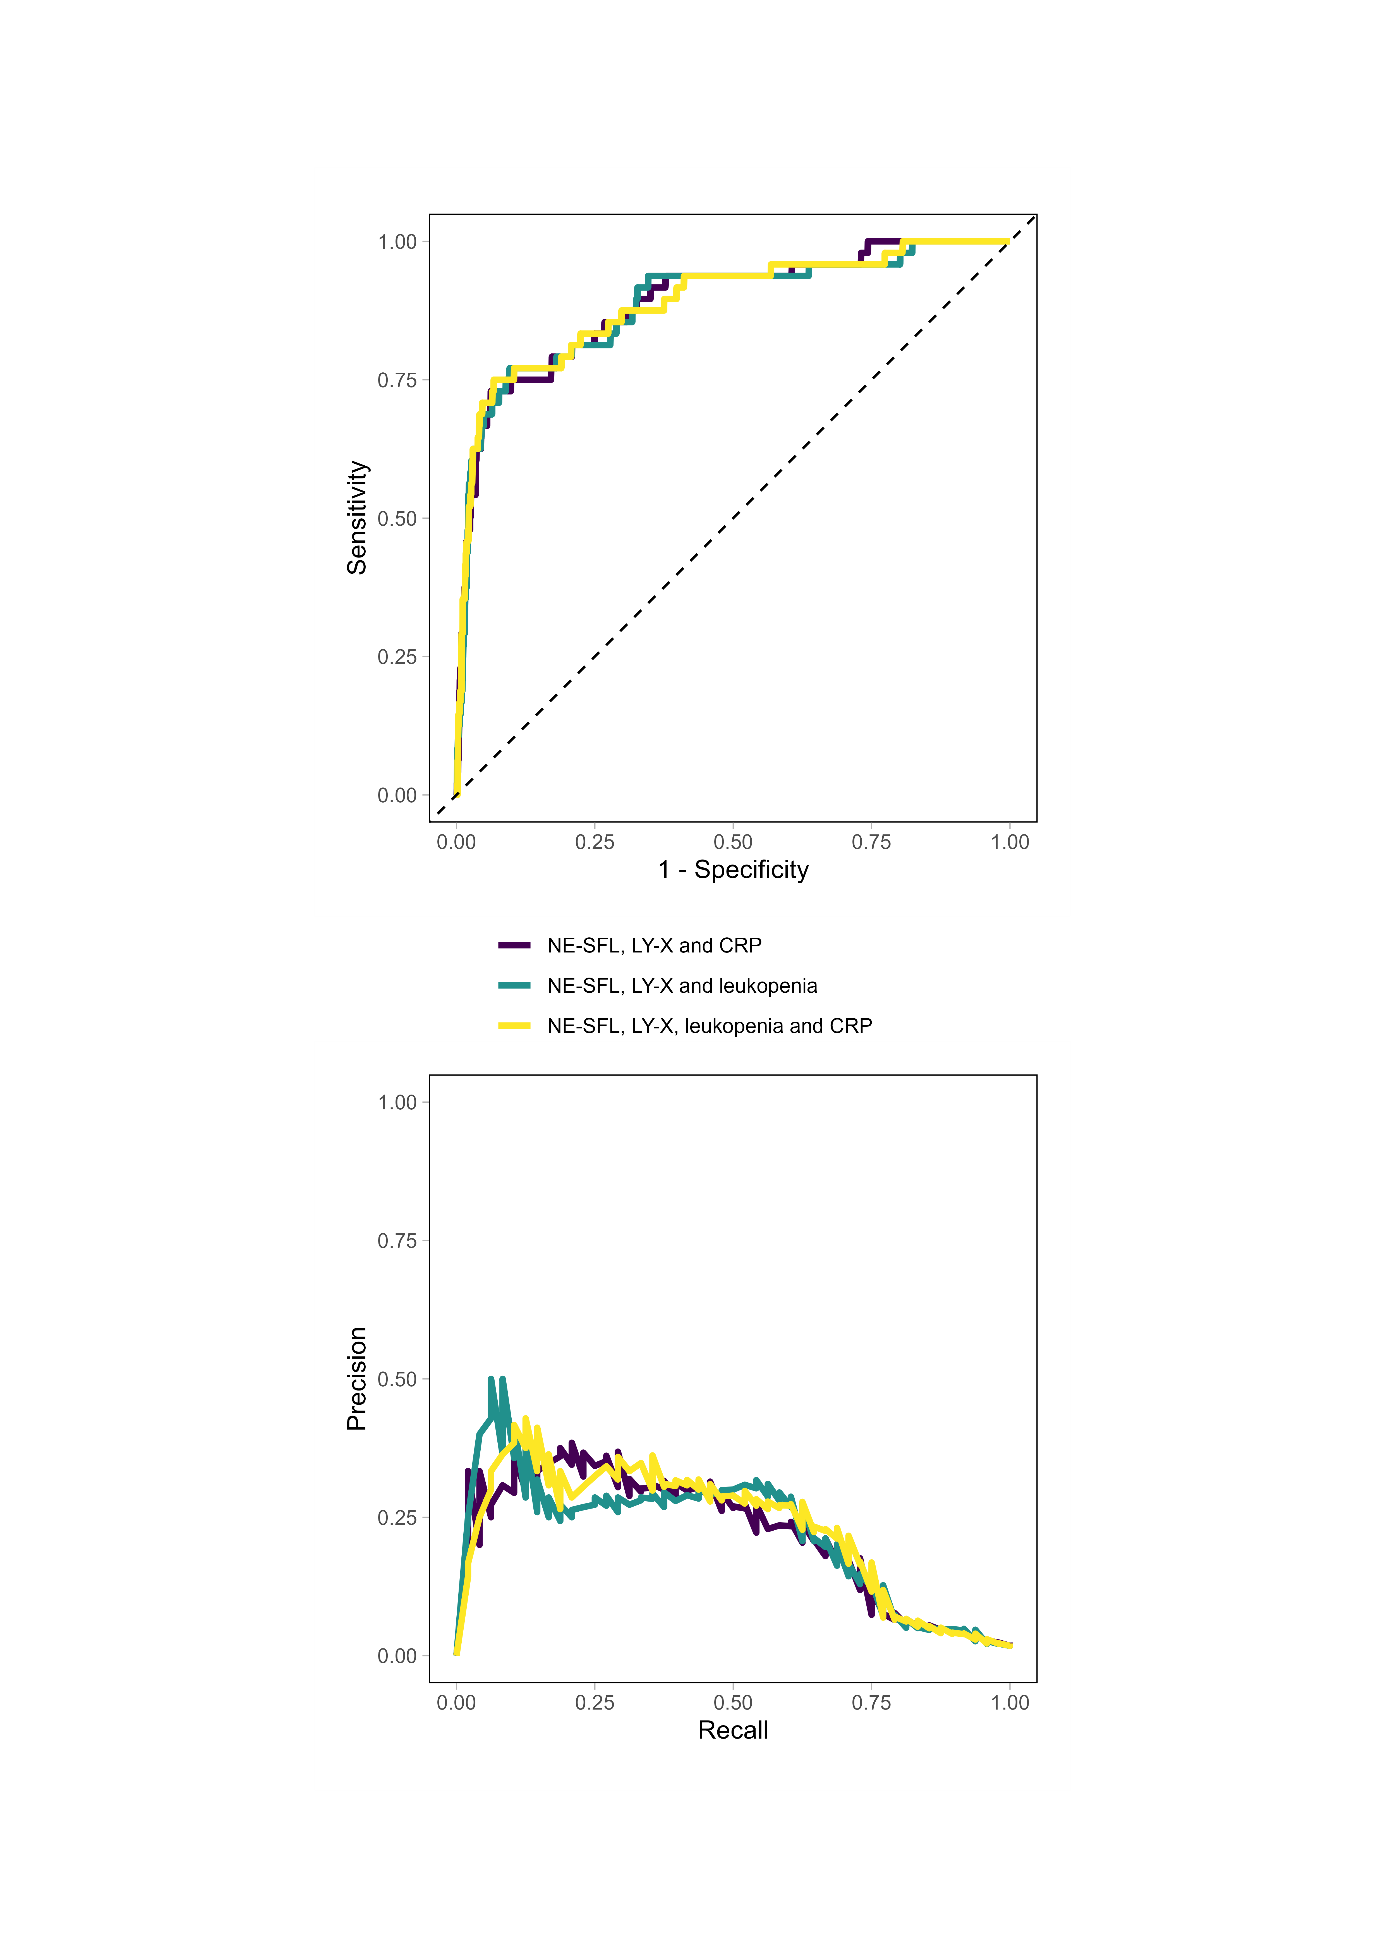


**a**

**b**

a) Receiver Operating Characteristic curve; b) Precision-Recall Curve

CRP, C-reactive protein.
